# Supplementary material for: Review article: Towards improved drought prediction in the Mediterranean region – modeling approaches and future directions
Source: Copernicus journal article supplement (doi:10.5194/nhess-23-3543-2023), 2023-11-21
Supplement: Supplementary file 1 [file nhess-23-3543-2023-supplement.pdf]

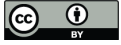

*Supplement of*

**Review article: Towards improved drought prediction in the  
Mediterranean region – modeling approaches and future directions**

**Bouchra Zellou et al.**

*Correspondence to:* Bouchra Zellou (bouchra.zellou@um6p.ma)

The copyright of individual parts of the supplement might differ from the article licence.

Table S1: Studies Utilized for Comparing the accuracy of Drought Prediction Models, as Depicted in Figure 4.

| Reference                        | drought approach | Forecast model     | Accuracy (R <sup>2</sup> ) |
|----------------------------------|------------------|--------------------|----------------------------|
| (Sousa et al, 2011)              | Statistical      | Regression         | 0,79                       |
| (Martínez-Fernández et al, 2016) | Statistical      | Regression         | 0,72                       |
| (Tigkas and Tsakiris, 2015)      | Statistical      | Regression         | 0,91                       |
| (Achite et al, 2022)             | Statistical      | Time series        | 0,97                       |
| (Pablos et al, 2017)             | Statistical      | Time series        | 0,8                        |
| (Jiménez-Donaire et al, 2020)    | Statistical      | Time series        | 0,82                       |
| (Di Nunno et al, 2021)           | Statistical      | AI                 | 0,9842                     |
| (El Aissaoui et al,2021)         | Statistical      | AI                 | 0,9                        |
| (Achour et al, 2020)             | Statistical      | AI                 | 0,912                      |
| (Habibi et al, 2018)             | Statistical      | Markov Chain       | 0,95                       |
| (Nalbantis and Tsakiris, 2009)   | Statistical      | Markov Chain       | 0,88                       |
| (Cancelliere et al, 2007)        | Statistical      | Markov Chain       | 0,895                      |
| (El Ibrahimy and Baali, 2018)    | Statistical      | Hybrid-statistical | 0,98                       |
| (Özger et al, 2020)              | Statistical      | Hybrid-statistical | 0,93                       |
| (Brouziyne et al, 2020)          | Dynamical        | Dynamical          | 0,72                       |
| (Mendicino et al, 2008)          | Dynamical        | Dynamical          | 0,86                       |
